# Supplementary material
Source: HighWire-hosted journal article supplement (https://www.annfammed.org/highwire/filestream/8006/field_highwire_adjunct_files/0/Nicholson-App2.pdf)
Supplement: Nicholson-App2.pdf [file Nicholson-App2.pdf]

Online Supplementary Material

Nicholson JM, Yeager DL, Macones G. A preventive approach to obstetric care in a rural hospital: association between higher rates of preventive labor induction and lower rates of cesarean delivery. *Ann Fam Med*. 2007;5:310-319.

<http://www.annfammed.org/cgi/content/full/5/4/310/DC1>

**Supplemental Appendix 2. X-Factors and Timing of Induction**

| <b>X-Factor</b>                                                                                                  | <b>When to Induce</b>                                                                           |
|------------------------------------------------------------------------------------------------------------------|-------------------------------------------------------------------------------------------------|
| Cocaine abuse (any kind)                                                                                         | At 38 weeks' gestation*                                                                         |
| Borderline oligohydramnios (AFI 5-7)                                                                             | At the time of diagnosis (if $\geq 38$ weeks, 0 days' gestation*)                               |
| Impending/threatened preeclampsia (excess term weight gain) (systolic BP > 140 mm Hg or diastolic BP > 84 mm Hg) | At the time of diagnosis (if $\geq 38$ weeks, 0 days' gestation*)                               |
| Cervical dilatation $\geq 4$ cm                                                                                  | At the time of diagnosis (if $\geq 38$ weeks, 0 days' gestation)                                |
| Increasing or severe depression                                                                                  | At the time of diagnosis (if $\geq 38$ weeks, 0 days' gestation)                                |
| Actual or high risk for domestic abuse                                                                           | At the time of diagnosis (if $\geq 38$ weeks, 0 days' gestation)                                |
| 3 or more visits to antepartum unit                                                                              | At the time of occurrence (if $\geq 38$ weeks, 0 days' gestation)                               |
| Indication for nonstress testing                                                                                 | At the time of occurrence, instead of nonstress testing (if $\geq 38$ weeks, 0 days' gestation) |

AFI = amniotic fluid index; BP = blood pressure.

\* Assumes excellent dating with sonogram between 6 and 20 weeks.

Explanation for use: X-factors are risk factors for which there is a known short latent period between identification of the factor and development of obstetric complications. The use of X-factors does not require calculation. If a patient is beyond 37 weeks, 6 days' gestation and an X-factor is identified, preventive labor induction is immediately scheduled. If a patient with an X-factor has a modified cervical Bishop score of less than 6, she is offered prostaglandin E<sub>2</sub> before the start of oxytocin.
